# Supplementary material
Source: Springer Nature journal article supplement (https://www.springermedizin.de/resource/supplementary/12913_2013_2804_MOESM1_ESM.pdf/9531406)
Supplement: MOESM1 [file 9531406]

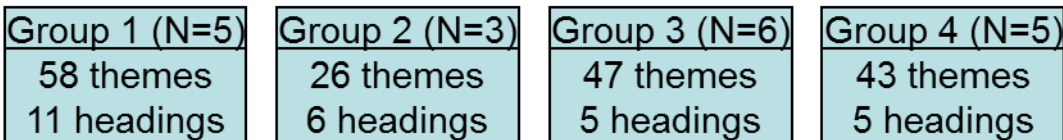

174 themes  
4 sets of headings

1) Remove  
duplicates

146 themes  
4 sets of headings

2) Combine themes  
with common meaning

98 themes  
4 sets of headings

3) Develop  
common headings

98 themes  
7 headings

4) Exclude  
replaceable  
themes

71 themes  
7 headings

5) Exclude  
themes rated as  
less important

40 themes  
7 headings
